# Supplementary material for: C-Terminally tagged NA in replication-competent influenza A viruses reveals differences in glycan profiles between NA and HA
Source: Royal Society of Chemistry journal article supplement (doi:10.1039/d0an00770f), 2020-01-01
Supplement: d0an00770f1.xlsx [file d0an00770f1.xlsx]

## Sheet: lectins
Supplementary Table 1 List of 45 lectins of used in lectin microarray analyses.
No.		Name	Origin	Reported glycan selectivitya
1		LTL	Lotus tetragonolobus	Fucα1-3GlcNAc, Lewis x, Sialyl Lewis x
2		PSA	Pisum sativum	Fucα1-6GlcNAc , α-Man
3		LCA	Lens culinaris	Fucα1-6GlcNAc , α-Man, α-Glc
4		UEA-I	Ulex europaeus	Fucα1-2Galβ1-4GlcNAc
5		AOL	Aspergillus oryzae	Terminal αFuc, Lewis x, Sialyl Lewis x
6		AAL	Aleuria auranti	Terminal αFuc, Lewis x, Sialyl Lewis x
7		MAL-I	Maackia amurensis	Siaα2-3Gal
8		SNA	Sambucus nigra	Siaα2-6Gal/GalNAc
9		SSA	Sambucus sieboldiana	Siaα2-6Gal/GalNAc
10		TJA-I	Trichosanthes japonica	Siaα2-6Galβ1-4GlcNAc
11		PHA-L	Phaseolus vulgaris	Tri/tetra-antennary complex-type N-glycan
12		ECA	Erythrina cristagalli	Lac/LacNAc
13		RCA120	Ricinus communis	Lac/LacNAc
14		PHA-E	Phaseolus vulgaris	Bi-antennary complex-type N-glycan with outer Gal and bisecting GlcNAc
15		DSA	Datura stramonium	Chitin, poly LacNAc, LacNAc
16		GSL-II	Griffonia simplicifolia	Agalactosylated tri/tetra antennary N-glycan
17		NPA	Narcissus pseudonarcissus	High-Mannose including Manα1-6Man
18		ConA	Canavalia ensiformis	High-Mannose including Manα1-6(Manα1-3)Man
19		GNA	Galanthus nivalis	High-Mannose including Manα1-3Man
20		HHL	Hippeastrum hybrid	High-Mannose including Manα1-3Man or Manα1-6Man
21		ACG	Agrocybe cylindracea	Siaα2-3Galβ1-4GlcNAc
22		TxLC-I	Tulipa gesneriana	Manα1-3(Manα1-6)Man, bi/tri-antennary complex-type N-glycan, GalNAc
23		BPL	Bauhinia purpurea	Galβ1-3GalNAc, tri/tetra-antennary complex-type N-glycan with outer Gal
24		TJA-II	ITanthes japonica	Fucα1-2Galβ1/GalNAcβ1, tri/tetra-antennary complex-type N-glycan with outer Gal
25		EEL	Euonymus europaeus	Galα1-3[Fuc α1-2 Gal], Gal α1-3 Gal
26		ABA	Agaricus bisporus	Galβ1-3GalNAcα-Thr/Ser (T) and sialyl-T
27		LEL	Lycopersicon esculentum	Chitin, poly LacNAc
28		STL	Solanum tuberosum	Chitin, poly LacNAc
29		UDA	Urtica dioica	Chitin, high-mannose
30		PWM	Phytolacca Americana	Chitin, high-mannose
31		Jacalin	Artocarpus integrifolia	Galβ1-3GalNAcα-Thr/Ser (T) and GalNAcα-Thr/Ser (Tn)
32		PNA	Arachis hypogaea	Galβ1-3GalNAcα-Thr/Ser (T)
33		WFA	Wisteria floribunda	GalNAcβ1-4GlcNAc (LacdiNAc), terminal GalNAc
34		ACA	Amaranthus caudatus	Galβ1-3GalNAcα-Thr/Ser (T)
35		MPA	Maclura pomifera	Galβ1-3GalNAcα-Thr/Ser (T) and GalNAcα-Thr/Ser (Tn)
36		HPA	Helix pomatia	Terminal GalNAc
37		VVA	Vicia villosa	α- or β-linked terminal GalNAc and GalNAcα-Thr/Ser (Tn)
38		DBA	Dolichos biflorus	GalNAcα-Thr/Ser (Tn) and GalNAcα1-3GalNAc
39		SBA	Glycine max	Terminal GalNAc
40		Calsepa	Calystegia sepium	Man, Maltose
41		PTL-I	Psophocarpus tetragonolobus	α-GalNAc, Gal
42		MAH	Maackia amurensis	Siaα2-3Galβ1-3(Siaα2-6)GalNAc (disialyl-T)
43		WGA	Triticum aestivum	Chitin, multivalent Sia
44		GSL-I-A4	Griffonia simplicifolia	α-GalNAc, GalNAcα-Thr/Ser (Tn)
45		GSL-I-B4	Griffonia simplicifolia	α-Gal
aSpecificitiy data of lectins were obtained form LfDB (Lectin frontier Database; http://riodb.ibase.aist.go.jp/rcmg/glycodb/LectinSerch).
